# Supplementary material
Source: publisher figshare collection journal article supplement (https://geolsoc.figshare.com/ndownloader/files/13612226)
Supplement: Supplementary file 1 [file 13612226]

## Sheet: Sheet1
Table S3. Trace element concentrations of clinopyroxene from the Luobusa harzburgites
Sample	B98	B106	B120	B143	B153	B169	B186	B199	B245	B281	B329
REE (ppb)
La	0.0013687	0.00642632	0.0101654	0.0111652	0.041917	0.00924318	0.0084353	0.00164301	0.0156497	0.00937715	0.0041617
Ce	0.00305216	0.00137895	0.00555919	0.0253354	0.0194669	0.00438331	0.0083301	0.00537656	0.0350468	0.00914845	0.00283138
Pr	0.0249393	0.00220172	0.0315455	0.071583	0.027416	0.0111233	0.0181319	0.0379346	0.117607	0.0658621	0.0471471
Nd	0.0784334	0.0500796	0.150511	0.14813	0.148732	0.106722	0.110216	0.180972	0.319302	0.329844	0.193753
Sm	0.796068	0.418469	1.03684	0.685105	1.28095	0.83787	0.574186	0.867593	0.807199	1.55443	1.42387
Eu	0.895262	0.474619	1.18029	0.723175	1.59484	1.23887	0.939313	1.03935	1.01213	2.13163	1.68137
Gd	1.74337	1.33868	2.31208	1.30384	2.5309	2.03006	1.57799	1.56334	1.7332	3.41772	2.89361
Tb	2.40056	1.68551	2.91149	1.52738	3.61091	2.79007	2.38437	2.9907	2.12527	4.20212	4.02956
Dy	3.17604	2.24164	4.03161	2.20894	4.49793	3.80736	3.09121	4.13256	3.05467	5.41155	5.05697
Ho	3.53866	2.5943	4.6195	2.50686	5.10222	4.05205	3.267	4.66467	2.99839	5.8	4.82936
Er	3.85303	3.11393	4.83281	3.35925	5.30887	4.45403	3.90417	4.96265	3.73701	6.14625	4.70792
Tm	3.74934	3.31588	4.72753	3.32127	5.58967	4.20689	4.09282	5.58557	4.01539	5.63458	4.2951
Yb	3.94284	3.47722	5.03443	3.71377	5.37028	4.30477	4.01473	5.52647	4.02289	6.27374	4.19038
Lu	3.40263	2.93392	4.5191	3.56572	4.80464	3.85376	3.5925	4.73392	3.37167	5.29276	3.78858
ΣREE	27.6056	21.6543	35.4035	23.1715	39.9287	31.7072	27.5834	36.2928	27.3654	46.279	37.1446
(La/Yb)CN	0.000347135	0.00184812	0.00201918	0.00300644	0.00780537	0.0021472	0.00210109	0.000297297	0.00389016	0.00149467	0.000993154
(La/Gd)CN	0.000785088	0.0048005	0.00439666	0.00856333	0.0165621	0.00455316	0.00534561	0.00105096	0.00902936	0.00274368	0.00143824
(Gd/Yb)CN	0.442161	0.384985	0.459253	0.351083	0.471279	0.471584	0.393049	0.282881	0.430834	0.544767	0.690535
(La/Pr)CN	0.0548812	2.91877	0.322246	0.155976	1.52892	0.830976	0.465218	0.0433115	0.133068	0.142375	0.0882705
δEu	0.705086	0.540215	0.704877	0.727194	0.836781	0.86395	0.872898	0.855101	0.796826	0.857428	0.778866
Trace elements (ppm)
Cs	0.00391713	0.00297103	0.0600392	0.037417	0.0158986	0.00532114	0.0152265	0.0245028	0.00379264	0.00493194	0.148392
Rb	0.0173948	0.072962	0.040341	0.040341	0.0209251	0.021158	0.0247151	0.0280315	0.00787943	0.0101321	0.0441288
Ba	0.0193934	0.138885	0.0487687	0.0392904	0.0544295	0.0113136	0.0280192	0.00926279	0.0170587	0.0359499	0.0239564
Th	0.000510625	0.00123031	0.000666653	0.00120711	0.000961169	0.00172971	0.00174849	0.00314433	0.00251542	0.00197283	0.00258251
U	0.00116887	0.00259281	0.00102879	0.00337799	0.000761066	0.00226499	0.00290566	0.00231193	0.00159158	0.00106024	0.00163082
Nb	0.0127738	0.0108728	0.00461778	0.00957109	0.00510371	0.00910929	0.0035635	0.00927695	0.00872446	0.0106191	0.0105592
Ta	0.00143704	0.0012143	0.000767702	0.00149775	0.00187317	0.00138129	0.000294835	0.00185024	0.0027876	0.0011053	0.0020757
La	0.00152304	0.000324382	0.00219063	0.00993434	0.00264616	0.00199917	0.000389393	0.00370897	0.000986322	0.00222238	0.0024092
Ce	0.000845294	0.00187097	0.00268697	0.0119332	0.0155306	0.00510635	0.00329583	0.0214837	0.00173564	0.005608	0.00340778
Pb	0.0279288	0.0464701	0.131851	0.0752696	0.380641	0.0314228	0.0174181	0.00578162	0.0143643	0.0140805	0.0201766
Pr	0.00020432	0.00231437	0.00103224	0.00254421	0.0066429	0.00168264	0.00352033	0.0109139	0.00437525	0.00611201	0.00292743
Sr	0.0902877	0.107059	0.35757	0.442534	0.814335	0.151874	0.120121	0.944413	0.130623	0.141945	0.108517
Nd	0.0228864	0.0358441	0.048772	0.0679704	0.0676955	0.0503686	0.082704	0.145921	0.088545	0.150739	0.0687836
Zr	0.034502	0.0574309	0.0931701	0.110186	0.355098	0.153734	0.115334	0.337576	0.299173	0.213951	0.157434
Hf	0.0161196	0.0311205	0.0495851	0.0735451	0.0307785	0.0359021	0.0448761	0.0361497	0.0639444	0.0675703	0.0566057
Sm	0.0619333	0.117818	0.124005	0.18958	0.101396	0.0849795	0.128404	0.119465	0.210733	0.230056	0.153453
Eu	0.026721	0.0504033	0.0697486	0.0897894	0.0407147	0.0528833	0.0585152	0.0569828	0.0946611	0.120011	0.0664503
Gd	0.266397	0.346931	0.403982	0.503649	0.259464	0.314019	0.311104	0.344906	0.575828	0.680127	0.460104
Tb	0.0608471	0.0866603	0.100722	0.130354	0.0551383	0.0860757	0.107964	0.0767222	0.145467	0.151697	0.105105
Dy	0.551443	0.781307	0.936609	1.10649	0.543398	0.760438	1.01661	0.751449	1.24402	1.33124	0.991776
Y	3.82795	4.96365	5.63832	7.08792	3.69212	4.54831	6.1696	4.63038	6.94159	7.67295	6.09979
Ho	0.141649	0.193211	0.221242	0.278581	0.136874	0.178378	0.254691	0.163712	0.263683	0.31668	0.252225
Er	0.498229	0.616485	0.712645	0.84942	0.53748	0.624668	0.794024	0.597921	0.753267	0.983401	0.77325
Tm	0.0819023	0.0926086	0.10391	0.138065	0.0820354	0.101093	0.137964	0.0991801	0.106089	0.139174	0.11677
Yb	0.559833	0.634797	0.693067	0.864615	0.597917	0.646371	0.889762	0.647685	0.674652	1.01007	0.810544
Lu	0.0721744	0.0837046	0.0948025	0.118194	0.0877167	0.0883755	0.116454	0.082943	0.0931991	0.130202	0.11117
Cr	6763.51	6111.11	7086.01	7086.01	5294.9	6256.95	6868.65	6650.59	6921.94	6313.17	5948.54
Co	20.0421	20.2407	19.8103	19.8103	23.9627	20.867	19.9658	20.2618	20.2902	19.8352	22.7773
Ni	360.463	360.975	353.956	353.956	525.508	357.701	347.031	347.561	357.289	355.359	380.686
Cu	1.12124	2.5989	1.36791	1.36791	1.92633	0.682939	0.584263	0.764536	0.890991	0.740423	1.22061
Zn	7.77826	10.4096	10.8856	10.8856	15.8781	10.8725	9.5713	8.26291	9.16401	7.75859	11.8149
Ga	2.11893	2.24345	2.68316	2.68316	2.00305	1.99477	2.5177	2.46699	2.39912	2.63985	2.4448
Li	11.9402	8.65467	11.364	13.7659	17.072	10.504	10.7484	9.7071	9.41356	11.8749	12.4318
Ta	0.0012143	0.00143704	0.0020757	0.00187317	0.00149775	0.000767702	0.00138129	0.000294835	0.00185024	0.0011053	0.0027876
V	250.733	231.528	224.617	200.708	236.217	220.519	208.847	231.966	224.64	241.866	222.931
Lu	0.0837046	0.0721744	0.11117	0.0877167	0.118194	0.0948025	0.0883755	0.116454	0.082943	0.130202	0.0931991
Sc	51.4321	52.7254	49.2147	67.8644	48.0929	51.3294	51.3339	52.843	54.407	50.0558	48.8905
REE—rare earth elements; CN—chondrite normalized; δEu=2 x EuCN/(SmCN + GdCN)
